# Supplementary material for: Iron deficiency exacerbates aortic medial degeneration by inducing excessive mitochondrial fission
Source: Royal Society of Chemistry journal article supplement (doi:10.1039/d2fo01084d), 2022-01-01

Figure S1: ID intensified the expression of mitophagy-related protein LC3B. (a) Double immunofluorescence (IF) staining was performed to detect the junction of Tom20 (green) and LC3B (red) in each group. Tom20 staining represented mitochondria, and LC3B staining represented mitophagy; hence, the overlap between the two represented autophagosome (yellow). (b) Mean fluorescence intensity of LC3B in each group. (c) Statistical analysis of common positioning indexes includes Pearson's Coefficient, Overlap Coefficient, and Manders' Coefficient 1 (fraction of red overlapping green). Data are representative of three independent experiments and presented as mean  $\pm$  SD. \* $P < 0.05$ , compared with the control group. % $P < 0.05$ , compared with the AngII group.

Figure S2: Mdivi-1 prominently inhibited ID-induced mitophagy *in vitro*. (a) Double immunofluorescence (IF) staining was performed to detect the junction of Tom20 (green) and LC3B (red) in each group. (b) Mean fluorescence intensity of LC3B in each group. (c) Statistical analysis of common positioning indexes includes Pearson's Coefficient, Overlap Coefficient, and Manders' Coefficient 1 (fraction of red overlapping green). Data are representative of three independent experiments and presented as mean  $\pm$  SD. # $P < 0.05$ , compared with the control group. % $P < 0.05$ , compared with the AngII group. & $P < 0.05$ , compared with the AngII+DFO group.

FigureS1

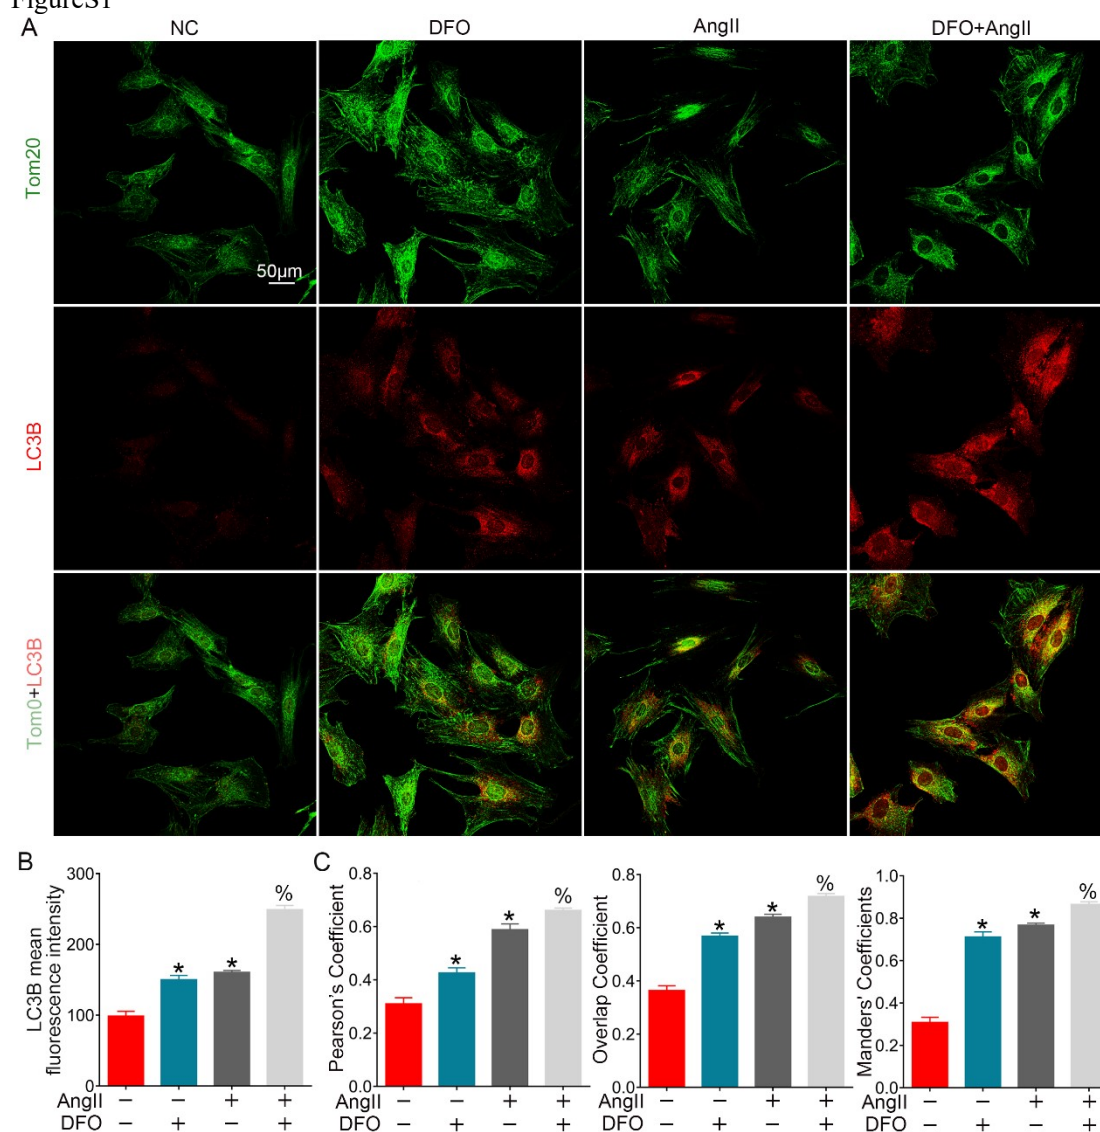

FigureS2

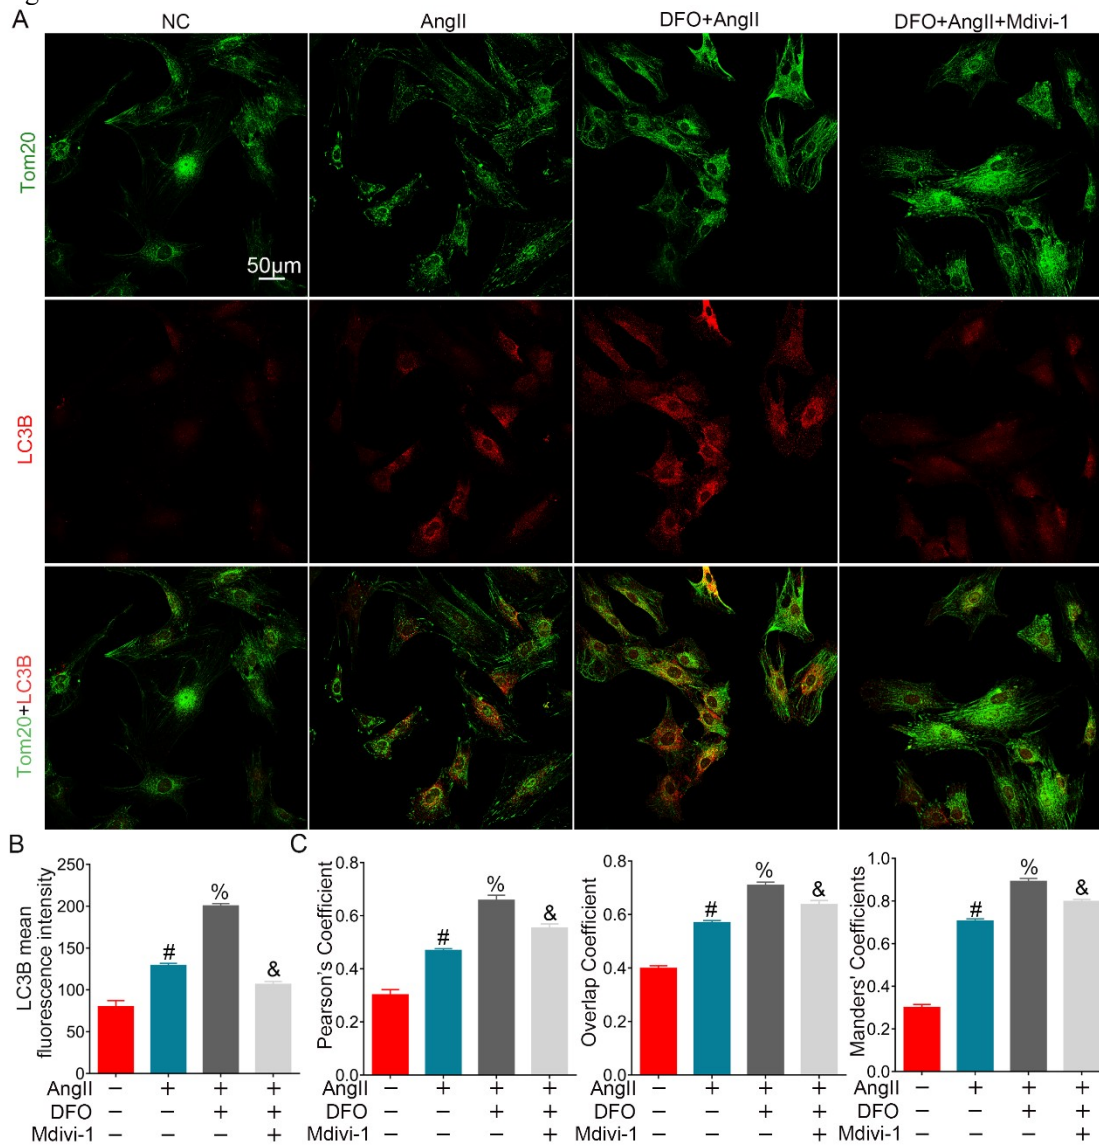

Supplement: d2fo01084d1.pdf [file d2fo01084d1.pdf]
